# Supplementary material
Source: publisher site journal article supplement (https://www.dovepress.com/article/500140)
Supplement: Supplementary file 1 [file get_supplementary_file.php]

Supplemental Tables

**Supplemental Table 1** Exclusion criteria

| **Exclusion Criteria for Exercise-Induced Shoulder Injury Protocol** | | | |
| --- | --- | --- | --- |
| Chronic pain (> 3 months) in any area | Currently experiencing neck or shoulder pain | | Previous history of upper extremity surgery |
| Neurologic impairment of the upper- extremity (determined by loss of sensation, muscle weakness, and reflex change) | Previous history of neck or shoulder pain (operationally defined as experiencing pain longer than 48 hours or seeking medical treatment) | | Currently or regularly use pain medication |
| Regular participation in upper- extremity weight training |  | |  |
| **Exclusion Criteria for Propranolol** | | | |
| Clinically significant abnormal 12 lead ECG | | Uncontrolled hypertension (resting systolic blood pressure below 90 mm Hg) | Sinus bradycardia (resting heart rate below 55 beats per minute) |
| Cardiac failure | | Wolff-Parkinson-White Syndrome |  |
| Greater than first degree heart block | | History of recent surgery requiring general anesthesia |  |
| **General Exclusion Criteria for Study Participation** | | | |
| Coronary heart disease | | Diabetes | Dementia |
| Known hypersensitivity to propranolol | | Chronic obstructive pulmonary disease | Major depression |
| Nonallergic bronchospasm | | Pregnancy | Breast feeding |
| Bronchial asthma | |  |  |

**Supplemental Table 2**. Descriptions of interventions. Participants were assigned to combinations of education and pharmaceutical interventions

| Psychological Education | The personalized psychologic intervention followed principles derived from psychologically informed interventions for musculoskeletal pain to bring about individual changes in beliefs and behavior related to pain. As pain catastrophizing was the primary psychological factor used to define the high-risk subgroup, special emphasis was placed on addressing it during the intervention. The personalized psychologic intervention was administered on days 2-4 following the exercise-induced muscle injury protocol, as it was based on the individual experiencing pain. The intervention consisted of scripted psychologic modules, each lasting 10-15 minutes. Participants viewed the modules on a computer and engaged in scripted interactions with research staff to discuss key principles and clarify any questions. |
| --- | --- |
| General Education | The general education intervention mirrored the structure and administration of the personalized intervention. However, its purpose was to passively provide information rather than induce changes in thoughts or beliefs about pain. The content of the general education modules focused on shoulder pain and aimed to enhance participants' understanding of shoulder anatomy and injury. Similar to the personalized intervention, the general education modules were administered on days 2-4 following the exercise-induced injury. They consisted of scripted content and lasted 10-15 minutes per session. Participants viewed the modules on a computer and had scripted interactions with research staff to reinforce key principles and address any queries. |
| Personalized Pharmaceutical | The first administration of propranolol took place before the injury to allow for any immediate pre-emptive effects on inflammatory or pain sensitivity regulation. This timing aligns with when propranolol would be administered in the proposed translational clinical model, namely pre-operatively. The UF Investigational Drug Service prepared long-acting propranolol (Propranolol LA) 60 mg, which was orally administered once daily in the Pain Clinical Research Unit. The selected dose was bioequivalent to those used in a recent clinical trial investigating responses to propranolol among patients with orofacial pain. Safety monitoring for cardiovascular response (early identification of potential adverse events) and pharmacologic effect (demonstrating medication absorption) was conducted by a research nurse 60 minutes after drug administration. |
| Placebo Pharmaceutical | The placebo capsules, prepared by the UF Investigational Drug Service, were visually indistinguishable from the active medication. Placebo administration followed the same procedure as described for the Personalized Pharmaceutical intervention, ensuring blinding. This included adhering to the same timing for each session and monitoring cardiovascular responses. |

Supplemental Table 3.

| **Day** | **Summary Stats** | **Placebo + Psychological Education** | **Placebo + General Education** | **Propranolol + Psychological Education** | **Propranolol + General Education** | **P-value** |
| --- | --- | --- | --- | --- | --- | --- |
| **Value** | **Value** | **Value** | **Value** |
| **Ipsilateral/dominant temporal summation @ 49°C – rating using 101-point NRS** | | | | | | |
| **Day 1** | Mean ± SD | 55.9 ± 24.7 | 55.2 ± 25.8 | 54.5 ± 21.8 | 56.6 ± 29.2 | 0.968 |
| Median (Min, Max) | 52.5 (14, 100) | 57.5 (10, 100) | 55 (12, 100) | 58.5 (2, 100) |  |
| **Day 2** | Mean ± SD | 54.7 ± 23.8 | 53.4 ± 26.1 | 51.0 ± 24.9 | 56.4 ± 28.2 | 0.757 |
| Median (Min, Max) | 53 (8, 100) | 50 (8, 100) | 50 (15, 100) | 60 (7, 100) |  |
| **Day 3** | Mean ± SD | 48.7 ± 23.9 | 49.7 ± 26.0 | 49.2 ± 26.0 | 51.7 ± 28.6 | 0.945 |
| Median (Min, Max) | 48.5 (7, 90) | 45 (5, 100) | 45 (5, 100) | 60 (5, 100) |  |
| **Day 4** | Mean ± SD | 49.6 ± 26.0 | 53.0 ± 26.1 | 49.3 ± 24.7 | 51.1 ± 27.3 | 0.896 |
| Median (Min, Max) | 45 (10, 98) | 56.5 (5, 100) | 50 (8, 95) | 56 (1, 100) |  |
| **Day 5** | Mean ± SD | 49.9 ± 26.5 | 50.3 ± 25.1 | 47.6 ± 25.7 | 52.1 ± 27.2 | 0.785 |
| Median (Min, Max) | 46 (3, 98) | 44.5 (3, 98) | 45 (0, 100) | 55 (1, 90) |  |
| **CMP efficiency (pre conditioning PPT – post conditioning PPT; kPa)** | | | | | | |
| **Day 1** | Mean ± SD | -72.1 ± 148.4 | -33.4 ± 188.3 | -30.3 ± 154.0 | -28.3 ± 94.9 | 0.287 |
| Median (Min, Max) | -50.9 (-415.5, 289.1) | -6.85 (-593.4, 532.2) | -28 (-529.7, 464.9) | -27.45 (-236.2, 176.4) |  |
| **Day 2** | Mean ± SD | -31.3 ± 121.9 | -41.1 ± 115.1 | -67.1 ± 100.2 | -37.7 ± 129.6 | 0.773 |
| Median (Min, Max) | -51 (-313.6, 277.4) | -37.75 (-309.7, 258) | -52.6 (-341, 100) | -46.1 (-418.2, 215.6) |  |
| **Day 3** | Mean ± SD | -41.0 ± 97.6 | -12.9 ± 115.5 | -29.6 ± 111.9 | -23.8 ± 130.2 | 0.400 |
| Median (Min, Max) | -29.4 (-274.4, 196) | -7.8 (-316, 376.3) | -9.95 (-330.3, 196) | -5.9 (-460.6, 211.7) |  |
| **Day 4** | Mean ± SD | -61.6 ± 117.3 | 6.0 ± 137.3 | -31.6 ± 116.6 | -20.2 ± 112.4 | 0.040 |
| Median (Min, Max) | -64.7 (-285.2, 247) | -1.95 (-235.7, 446.9) | -23.5 (-404.1, 348.1) | -17.65 (-308.7, 309.6) |  |
| **Day 5** | Mean ± SD | -40.9 ± 143.4 | -0.0 ± 102.8 | -29.6 ± 127.4 | -12.2 ± 86.6 | 0.228 |
| Median (Min, Max) | -51 (-389.2, 511.1) | -12 (-211.3, 301.9) | -12.7 (-422.1, 317) | -27.45 (-203.9, 168) |  |
| **Cold pressor tolerance (time in seconds)** | | | | | | |
| **Day 1** | Mean ± SD | 56.3 ± 9.7 | 53.0 ± 15.2 | 54.9 ± 11.5 | 57.4 ± 8.4 | 0.476 |
| Median (Min, Max) | 60.05 (21, 61) | 60 (6.8, 61) | 60 (19.1, 61) | 60 (25.1, 61) |  |
| **Day 2** | Mean ± SD | 58.6 ± 6.0 | 55.2 ± 12.5 | 56.2 ± 11.1 | 57.1 ± 9.0 | 0.838 |
| Median (Min, Max) | 60 (26.01, 61) | 60 (8.27, 60.1) | 60 (8.5, 61) | 60 (23, 61) |  |
| **Day 3** | Mean ± SD | 58.6 ± 6.4 | 54.4 ± 14.6 | 57.0 ± 9.9 | 57.4 ± 8.0 | 0.739 |
| Median (Min, Max) | 60 (24.63, 61) | 60 (8, 61) | 60 (10.2, 61) | 60 (23, 61) |  |
| **Day 4** | Mean ± SD | 59.2 ± 4.8 | 55.0 ± 13.7 | 57.7 ± 9.1 | 57.6 ± 8.1 | 0.659 |
| Median (Min, Max) | 60.05 (27.16, 61) | 60 (7.56, 60.1) | 60 (8.5, 60.1) | 60 (20.96, 61) |  |
| **Day 5** | Mean ± SD | 59.1 ± 5.4 | 54.4 ± 14.7 | 57.5 ± 9.7 | 58.1 ± 7.4 | 0.834 |
| Median (Min, Max) | 60 (21.3, 60.1) | 60 (8.93, 61) | 60 (15.39, 61) | 60 (27.15, 61) |  |
| **Average presure pain threshold (PPT) of Ipsilateral/Dominant Deltoid - kPa** | | | | | | |
| **Day 1** | Mean ± SD | 326.6 ± 206.9 | 315.1 ± 153.9 | 320.7 ± 191.1 | 271.2 ± 154.6 | 0.214 |
| Median (Min, Max) | 270.96 (64.86, 1000.1) | 303.02 (118, 971.48) | 258.91 (70.56, 828.8) | 230.31 (88.6, 804.78) |  |
| **Day 2** | Mean ± SD | 250.8 ± 162.2 | 270.0 ± 135.9 | 256.6 ± 173.8 | 235.3 ± 143.3 | 0.311 |
| Median (Min, Max) | 199.39 (46.06, 1000.1) | 248.12 (110.92, 740.36) | 218.36 (35.66, 724) | 189.92 (83.48, 665.22) |  |
| **Day 3** | Mean ± SD | 243.0 ± 159.8 | 259.0 ± 130.7 | 259.0 ± 159.8 | 230.9 ± 145.5 | 0.301 |
| Median (Min, Max) | 191.82 (44.3, 1000.1) | 235.49 (86.24, 817.32) | 220.78 (42.72, 794.78) | 174.82 (61.92, 604.28) |  |
| **Day 4** | Mean ± SD | 242.0 ± 171.7 | 250.8 ± 133.8 | 257.5 ± 158.0 | 245.0 ± 178.8 | 0.529 |
| Median (Min, Max) | 202.77 (37.64, 1000.1) | 228.45 (101.9, 924.4) | 216.06 (40.38, 782.06) | 194.6 (49.78, 921.58) |  |
| **Day 5** | Mean ± SD | 251.2 ± 162.4 | 280.1 ± 147.4 | 282.0 ± 206.3 | 235.1 ± 163.3 | 0.068 |
| Median (Min, Max) | 216.26 (47.04, 1000.1) | 264.6 (68.2, 966.58) | 208.16 (34.88, 922.28) | 188.54 (52.92, 828.7) |  |
| **Average presure pain threshold (PPT) of Ipsilateral/Dominant Tibialis Anterior - kPa** | | | | | | |
| **Day 1** | Mean ± SD | 467.2 ± 224.2 | 461.7 ± 197.4 | 454.6 ± 216.4 | 392.6 ± 202.6 | 0.101 |
| Median (Min, Max) | 452.96 (57.575, 1000.1) | 446.875 (177.36, 951.96) | 424.43 (130.14, 1000.1) | 307.72 (166.22, 1000.1) |  |
| **Day 2** | Mean ± SD | 380.6 ± 207.9 | 406.0 ± 173.2 | 404.9 ± 227.6 | 352.9 ± 198.8 | 0.216 |
| Median (Min, Max) | 349.33 (64.28, 1000.1) | 372 (138.46, 842.32) | 321.44 (104.66, 1000.1) | 265.77 (122.8, 944.34) |  |
| **Day 3** | Mean ± SD | 380.8 ± 202.7 | 398.7 ± 171.2 | 404.5 ± 222.7 | 347.3 ± 193.6 | 0.249 |
| Median (Min, Max) | 359.84 (57.82, 1000.1) | 365.84 (136.44, 900.7) | 343.17 (86.24, 981.18) | 295.8 (107.4, 949.4) |  |
| **Day 4** | Mean ± SD | 375.2 ± 219.6 | 400.7 ± 180.0 | 399.4 ± 219.4 | 352.7 ± 198.8 | 0.286 |
| Median (Min, Max) | 288.61 (47.8, 1000.1) | 369.54 (144.26, 944.05) | 337.9 (93.34, 1000.1) | 291.15 (128.58, 996.34) |  |
| **Day 5** | Mean ± SD | 364.8 ± 210.0 | 392.2 ± 182.9 | 403.9 ± 229.4 | 336.1 ± 185.7 | 0.259 |
| Median (Min, Max) | 321.64 (43.5, 1000.1) | 356.34 (135.24, 951.42) | 333.58 (94.88, 983.54) | 284.01 (88.2, 800.46) |  |
| **Cold pressor pain - rating using 101-point NRS** | | | | | | |
| **Day 1** | Mean ± SD | 47.9 ± 21.2 | 60.9 ± 74.3 | 48.7 ± 19.5 | 50.5 ± 25.9 | 0.795 |
| Median (Min, Max) | 46.5 (0, 100) | 50 (0, 570.4) | 50 (10, 95) | 50 (2, 100) |  |
| **Day 2** | Mean ± SD | 56.8 ± 48.1 | 53.8 ± 24.7 | 55.7 ± 47.7 | 52.9 ± 27.4 | 0.937 |
| Median (Min, Max) | 50 (5, 364.6) | 50 (5, 100) | 48 (10, 374.4) | 54.5 (2, 100) |  |
| **Day 3** | Mean ± SD | 58.7 ± 46.2 | 51.7 ± 22.8 | 50.0 ± 21.1 | 62.9 ± 52.4 | 0.650 |
| Median (Min, Max) | 56.5 (0, 348.9) | 50 (10, 90) | 50 (5, 90) | 60 (0, 332.2) |  |
| **Day 4** | Mean ± SD | 59.3 ± 67.8 | 51.9 ± 22.6 | 49.1 ± 20.1 | 63.8 ± 63.0 | 0.620 |
| Median (Min, Max) | 50 (0, 521.4) | 50 (5, 95) | 47.5 (5, 90) | 61 (1, 414.2) |  |
| **Day 5** | Mean ± SD | 51.1 ± 23.4 | 52.8 ± 23.9 | 49.9 ± 24.7 | 62.9 ± 91.1 | 0.865 |
| Median (Min, Max) | 50 (0, 100) | 56 (5, 95) | 45 (5, 138) | 50 (2, 693.8) |  |
| **Rating thermal ipsilateral/dominant forearm midline (49°C) using 101-point NRS** | | | | | | |
| **Day 1** | Mean ± SD | 17.6 ± 13.3 | 19.6 ± 16.0 | 19.7 ± 15.5 | 20.4 ± 20.1 | 0.875 |
| Median (Min, Max) | 15 (0, 60) | 15 (0, 60) | 15 (0, 70) | 13 (0, 80) |  |
| **Day 2** | Mean ± SD | 15.7 ± 12.8 | 17.7 ± 13.3 | 15.7 ± 13.8 | 17.3 ± 16.6 | 0.697 |
| Median (Min, Max) | 11.5 (0, 60) | 18 (0, 60) | 10 (0, 55) | 10 (0, 80) |  |
| **Day 3** | Mean ± SD | 13.2 ± 10.8 | 16.1 ± 13.6 | 16.2 ± 13.2 | 14.7 ± 13.8 | 0.642 |
| Median (Min, Max) | 10 (0, 46) | 15 (0, 55) | 10 (0, 60) | 10 (0, 60) |  |
| **Day 4** | Mean ± SD | 11.0 ± 9.3 | 14.6 ± 14.1 | 13.6 ± 12.7 | 14.3 ± 13.9 | 0.710 |
| Median (Min, Max) | 9 (0, 35) | 10 (0, 65) | 10 (0, 60) | 10 (0, 60) |  |
| **Day 5** | Mean ± SD | 12.0 ± 11.2 | 12.9 ± 11.8 | 13.6 ± 11.9 | 12.8 ± 13.3 | 0.708 |
| Median (Min, Max) | 9 (0, 50) | 10 (0, 40) | 10 (0, 50) | 10 (0, 60) |  |
| **Average presure pain threshold (PPT) of Contralateral/Non-Dominant Deltoid - kPa** | | | | | | |
| **Day 1** | Mean ± SD | 330.6 ± 198.7 | 324.1 ± 164.5 | 317.2 ± 195.0 | 284.8 ± 165.3 | 0.245 |
| Median (Min, Max) | 293.99 (51.56, 1000.1) | 275.18 (153.66, 975.36) | 253.05 (45.1, 865.64) | 232.67 (108.98, 793.42) |  |
| **Day 2** | Mean ± SD | 261.7 ± 169.0 | 263.3 ± 124.7 | 268.2 ± 181.4 | 234.0 ± 117.8 | 0.582 |
| Median (Min, Max) | 222.28 (52.9, 1000.1) | 228.18 (67.82, 644.12) | 203.84 (62.32, 827.2) | 185.42 (74.84, 597.42) |  |
| **Day 3** | Mean ± SD | 249.8 ± 170.2 | 258.9 ± 144.8 | 258.9 ± 167.8 | 225.2 ± 128.1 | 0.444 |
| Median (Min, Max) | 197.18 (52.32, 1000.1) | 222.8 (59.2, 866.82) | 204.31 (48.22, 756.16) | 169.2 (45.08, 535.08) |  |
| **Day 4** | Mean ± SD | 236.6 ± 165.6 | 251.1 ± 147.0 | 255.6 ± 158.5 | 226.8 ± 140.2 | 0.570 |
| Median (Min, Max) | 203.45 (41.16, 1000.1) | 213.45 (89.58, 894.42) | 203.04 (22.74, 724.82) | 184.24 (65.86, 668.88) |  |
| **Day 5** | Mean ± SD | 255.7 ± 175.2 | 269.8 ± 150.9 | 276.1 ± 203.4 | 223.2 ± 131.5 | 0.231 |
| Median (Min, Max) | 213.5 (54.08, 1000.1) | 232.46 (109.16, 964.22) | 207.95 (59.56, 975.2) | 184.48 (43.12, 651.88) |  |

Bold text represents variable names and the protocol day.
